# Supplementary material for: Nucleoporin Nup62 maintains centrosome homeostasis
Source: PubMed Central journal article supplement — Cell Cycle. 2013 Oct 7;12(24):3804–16. doi: 10.4161/cc.26671 (PMC3905072; doi:10.4161/cc.26671), 2013-10-07
Supplement: cc-12-3804-s01.pdf [file cc-12-3804-s01.pdf]

## **Supplemental Material to:**

**Chieko Hashizume, Akane Moyori, Akiko Kobayashi,  
Nana Yamakoshi, Aoi Endo, and Richard W Wong**

**Nucleoporin Nup62 maintains centrosome homeostasis**

**Cell Cycle 2013; 12(24)**

**<http://dx.doi.org/10.4161/cc.26671>**

**<http://www.landesbioscience.com/journals/cc/article/26671>**

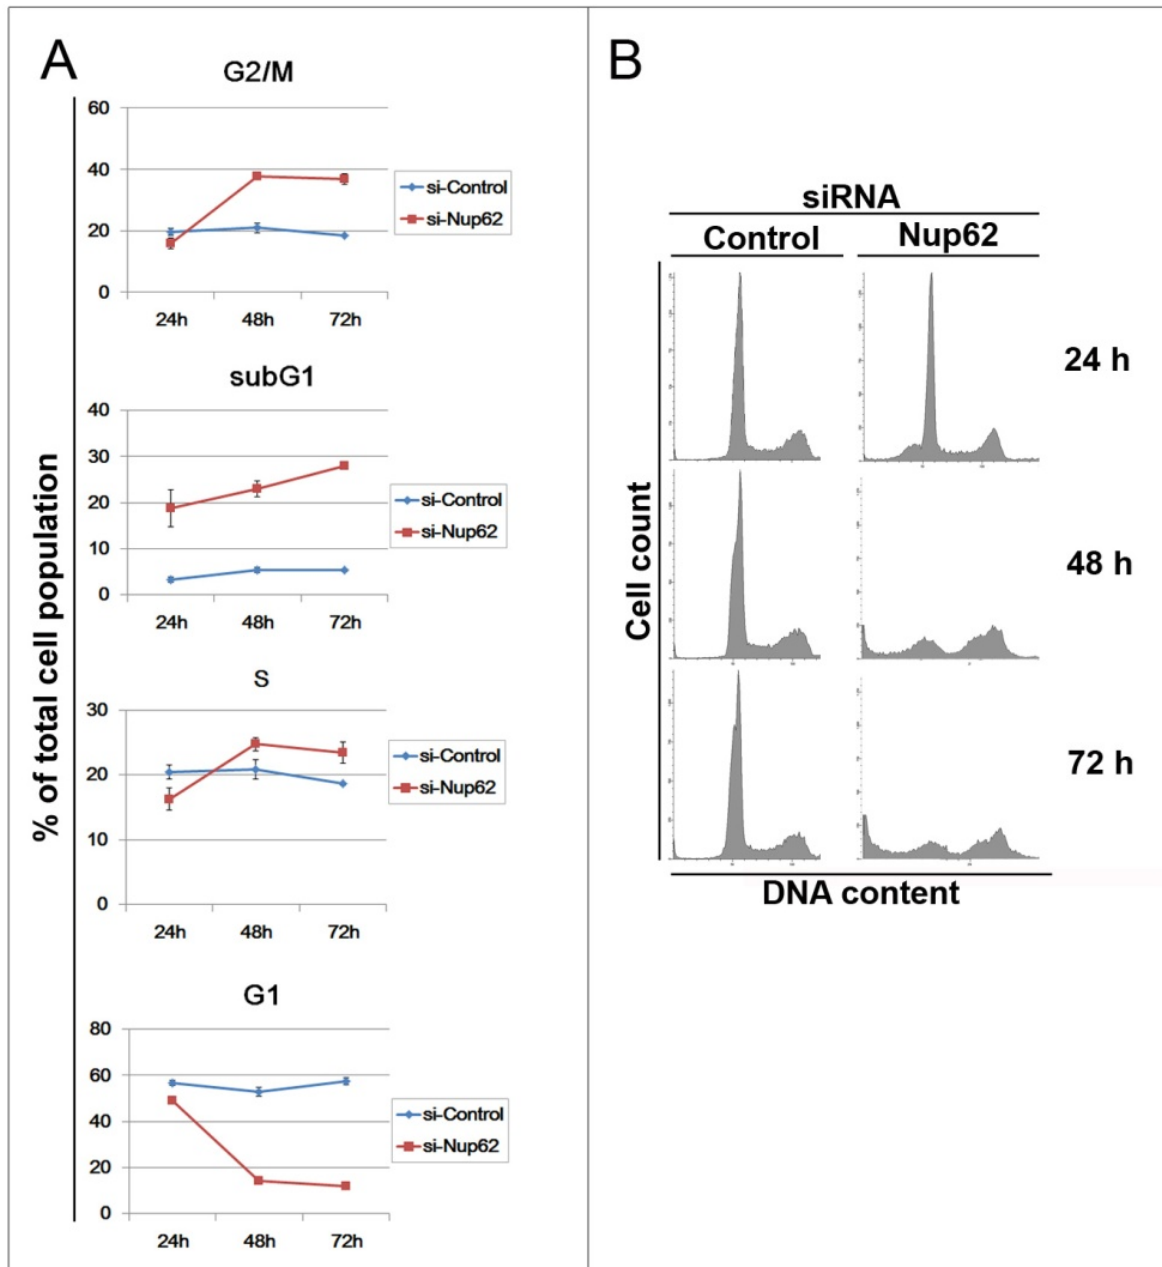

**Supplemental Figure S1. Depletion of Nup62 induced G2/M mitotic arrest**

A. Percentage of G1, G2/M, S, and Sub-G1 cells were calculated based on the results shown in Figure 1G.

B. Flow cytometric profiles of HeLa cells transfected with control or Nup62 siRNA. DNA was stained quantitatively with propidium iodide.

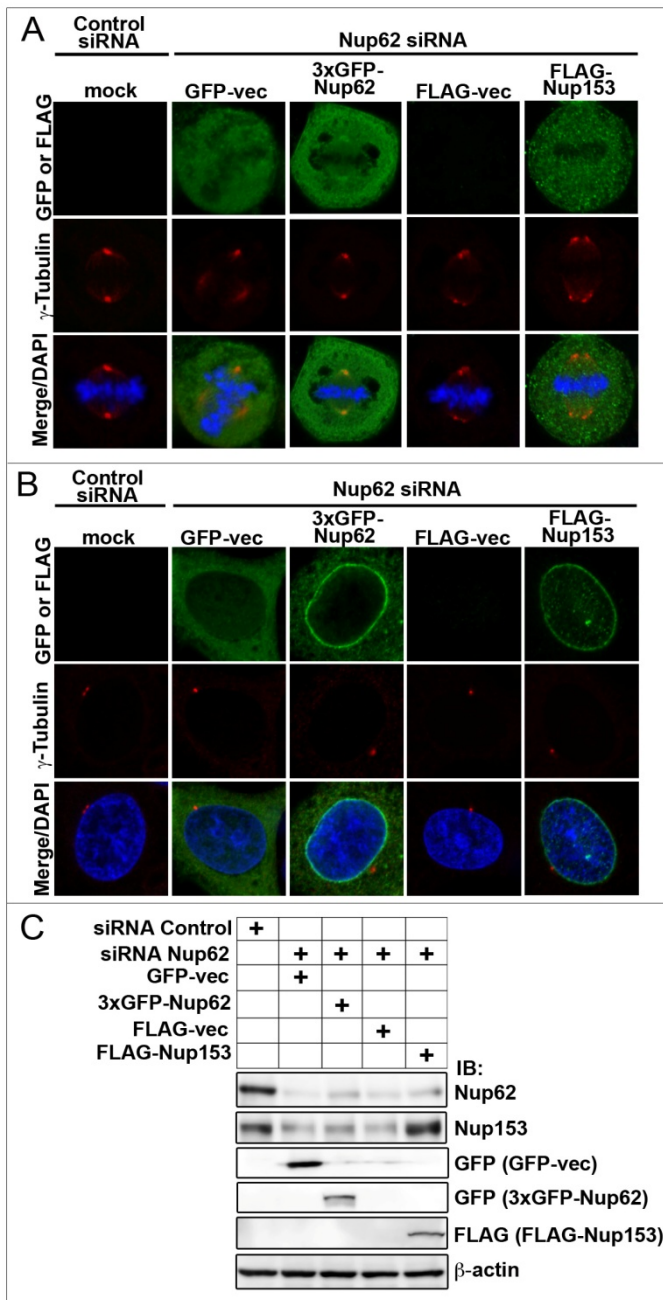

### Supplemental Figure S2. Nup153 could not rescue Nup62 mitotic defects.

A. Representative images of mitotic HeLa cells, transfected with indicated siRNA and/or plasmid. Seventy-two hours after transfection, cells were stained with centrosome marker anti-GFP/FLAG (green), anti- $\gamma$ -tubulin (red). All cells were treated with double thymidine block, stained with DAPI, and visualized by confocal microscopy. Scale bars, 5  $\mu$ m.

B. Representative images of mitotic HeLa cells, transfected with indicated siRNA and/or plasmid. Seventy-two hours after transfection, cells were stained with centrosome marker anti-GFP/FLAG (green), anti- $\gamma$ -tubulin (red), and analyzed by confocal laser microscopy. Chromatin was stained with DAPI (blue). Scale bars, 5  $\mu$ m.

C. Immunoblotting of protein expression for quantification (relative percentage) of centrosomal defect phenotypes for the indicated siRNA and/or plasmid (6G).

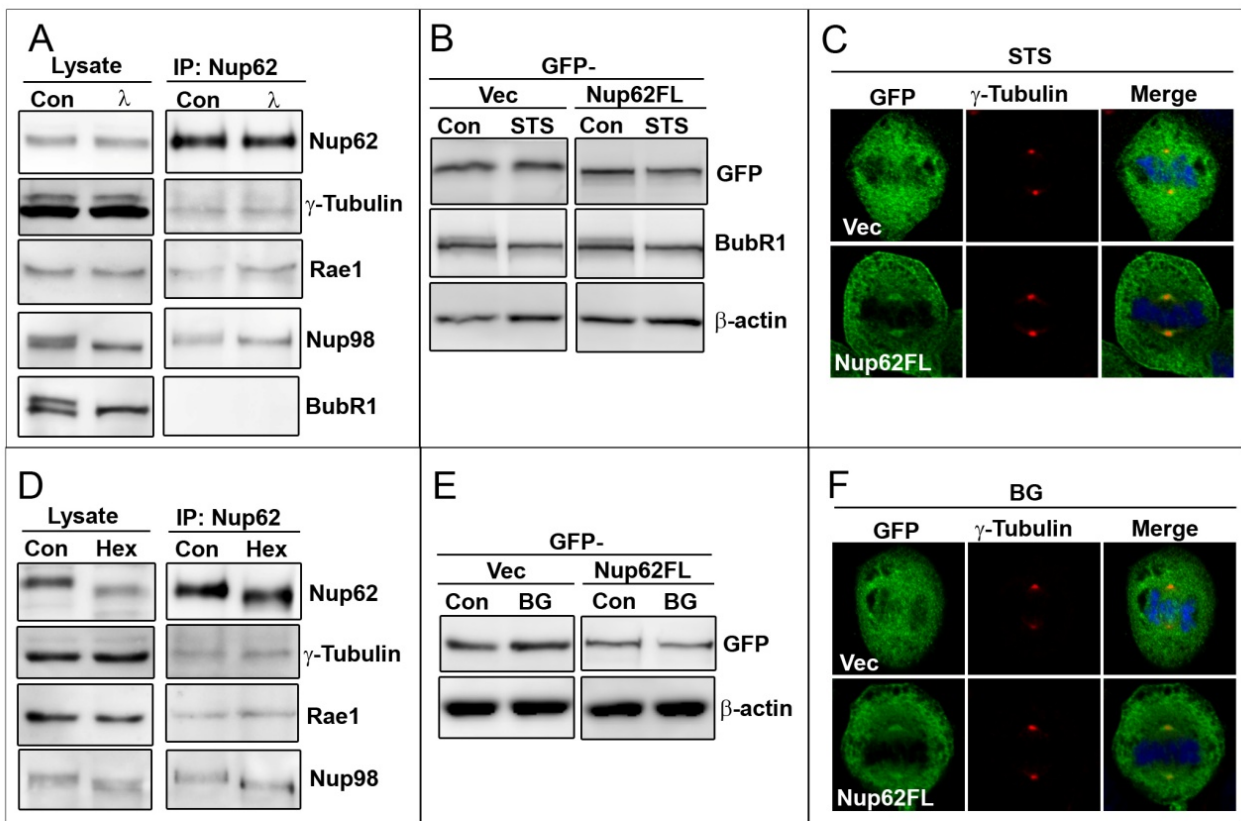

### Supplemental Figure 3

#### Neither phosphorylation nor O-glycosylation of Nup62 significantly altered its centrosome localization and expression during mitosis

A and D, Mitotic HeLa cell extract or IP with anti-Nup62 antibody were treated or untreated with  $\lambda$  protein phosphatase (PPase) (a common chemical used to release phosphate groups from phosphorylated serine, threonine and tyrosine residues in proteins) (A), or  $\beta$ -N-Acetyl-Hexosaminidase (Hex) was used to remove O-GlcNAc (N-Acetylglucosaminidase on serine/threonine) (D). These lysates were analyzed by IB with the indicated antibodies.

B and E, HeLa cells transfected with GFP-vector or GFP-tagged full-length Nup62 plasmid

and treated with DMSO (Con), 10  $\mu$ M of Staurosporine (STS) (B), 33 nM of Benzyl 2-acetamido-2-deoxy- $\alpha$ -D-galactopyranoside (BG) (E), or 3  $\mu$ M of MG-132 (MG) were analyzed by IB with the indicated antibodies.

C and F, Confocal microscopy images of HeLa cells transfected with GFP-vector or GFP-tagged full-length Nup62 plasmid were treated with DMSO (Con), 10  $\mu$ M of STS (C), 33 nM of BG (F), or 3  $\mu$ M of MG-132 (H) and stained with anti-GFP (green) or anti- $\gamma$ -tubulin (red) antibodies.

**Supplemental Table1. Plasmids construction details in this study.**

| Protein                                  | Residues (aa) | Vector      | Restriction sites 5', 3'  | Tags N/C   |
|------------------------------------------|---------------|-------------|---------------------------|------------|
| Subclone constructs                      |               |             |                           |            |
| Nup62 (full length)                      | 1-523         | pJET1.2     | bluntend                  | none/none  |
| Nup153 (full length)                     | 1-1476        | pCMV6-XL4   | from OriGene Technologies | none/none  |
| Immunofluorescence microscopy constructs |               |             |                           |            |
| mNup62FL                                 | 1-526         | p3xEGFP     | from Euroscarf            | none/3xGFP |
| Nup62N1                                  | 1-150         | pEGFP-C3    | XhoI, HindIII             | GFP/none   |
| Nup62N2                                  | 151-327       | pEGFP-N1    | XhoI, HindIII             | none/GFP   |
| Nup62C1                                  | 328-458       | pEGFP-N1    | XhoI, HindIII             | none/GFP   |
| Nup62C2                                  | 328-523       | pEGFP-N1    | XhoI, HindIII             | none/GFP   |
| Nup153 (full length)                     | 1-1476        | p3xFLAG-CMV | NotI, NotI                |            |

**Supplemental Table 2. Primer sequences in this study.**

---

|                            | 5' Primer                        | 3' Primer                  |
|----------------------------|----------------------------------|----------------------------|
| <b>Subcloning</b>          |                                  |                            |
| Nup62FL                    | GCTCGAGCTCATATGAGCGGGTTTAATTTT   | CAAGCTTGTCAAAGGTGATCCGGAA  |
| Nup62N1 <sub>1-150</sub>   | GCTCGAGCATATGAGCGGGTTTAATTTTGGGA | CAAGCTTAGCCACAGAGGTGGTGGGA |
| Nup62N2 <sub>151-327</sub> | GCTCGAGCATATGCCAGCTACCACATCTGGA  | CAAGCTTGGCGGAGCTGGCAGCCGC  |
| Nup62C1 <sub>328-458</sub> | GCTCGAGCATATGACCTACGCGCAGCTGGAG  | CAAGCTTCAGGTGCTCGATGATGTC  |
| Nup62C2 <sub>328-523</sub> | GCTCGAGCATATGACCTACGCGCAGCTGGAG  | CAAGCTTGTCAAAGGTGATCCGGAA  |

---
